# Killing them softly with EPO: a new role for erythropoietin in the homeostasis of red blood cells

Clemente F. Arias<sup>1,2,\*</sup>, Nuno Valente-Leal<sup>3</sup>, Federica Bertocchini<sup>1</sup>, Sofia Marques<sup>3</sup>, Francisco J. Acosta<sup>4</sup>, and Cristina Fernandez-Arias<sup>3,5,\*</sup>

<sup>1</sup>Centro de Investigaciones Biológicas (CSIC), Madrid, Spain

<sup>2</sup>Grupo Interdisciplinar de Sistemas Complejos (GISC), Madrid, Spain

<sup>3</sup>Instituto de Medicina Molecular, Universidade de Lisboa, Portugal

<sup>4</sup>Departamento de Ecología, Universidad Complutense de Madrid, Spain

<sup>5</sup>Departamento de Immunología, Facultad de Medicina, Universidad Complutense de Madrid, Spain

Corresponding authors:

\*CFA: [tifar@ucm.es](mailto:tifar@ucm.es)

\*CrF-A: [crifar25@ucm.es](mailto:crifar25@ucm.es)

## ABSTRACT

The regulation of red blood cell (RBC) homeostasis is widely assumed to rely on the control of cell production by erythropoietin (EPO) and the destruction of cells at a fixed, species-specific age. In this work, we show that such a regulatory mechanism is a poor homeostatic solution to satisfy the changing needs of the body. Effective homeostatic control requires RBC lifespan to be variable and tightly regulated. We show that EPO controls RBC lifespan by determining CD47 expression in newly formed RBCs and SIRP- $\alpha$  expression in sinusoidal macrophages. EPO also controls the initiation and intensity of anti-RBC autoimmune responses that curtail RBC lifespan in some circumstances. These mechanisms continuously modulate the rate of RBC destruction depending on oxygen availability. The finding of new homeostatic roles for EPO and autoimmunity critically challenges the current paradigm of RBC homeostasis and sets the grounds for a new approach to this field.

**Keywords:** Red blood cells; Homeostasis; CD47; SIRP- $\alpha$ ; Phosphatidylserine; Cell lifespan; Population dynamics models; Autoimmunity.

## Introduction

Red blood cells (RBCs) undergo a continuous turnover in which aged cells are destroyed in the liver and the spleen and are replaced by new cells formed in the bone marrow. The balance between production and destruction must be tightly regulated to ensure oxygen supply to the tissues and to maintain blood volume and viscosity within physiological ranges. It is well established that RBC production is controlled by erythropoietin (EPO) [1, 2]. Low oxygen levels increase the concentration of EPO in the blood, which accelerates the proliferation and differentiation of erythroid precursors in the bone marrow, boosting the number of cells [2, 3]. An excess of oxygen inhibits EPO production, which delays the recruitment of new RBCs into the blood [4].

As for RBC destruction, mammalian RBCs are devoid of most intracellular structures [5, 6], so they escape the canonical way to remove cells from tissues, which is apoptosis [7, 8]. Instead, they are eliminated by macrophages of the splenic and hepatic sinusoids when they reach a critical species-specific age (around 60 days in rats, 70 in cats, 120 in humans, 150 in horses, and 160 in bovines [9, 10]). The marked regularity in RBC lifespan among mammal species led to the prevalent idea that RBC lifespan is fixed [11, 12].

It has long been accepted that the control of cell production by EPO and the destruction of aged RBCs by sinusoidal macrophages suffice to explain the regulation of RBC homeostasis [13–15]. In this work, we show that such a regulatory mechanism based on the control of cell production and a fixed lifespan is a poor homeostatic

solution to face changes in oxygen demand or availability. The ability to vary cell lifespan is necessary to rapidly adjust the number of cells if the needs of the body tissues change. From a functional viewpoint, if a fixed lifespan severely constrains homeostasis, we should expect lifespan to be variable. The question naturally arises of whether this is mechanistically possible.

RBC lifespan is normally assumed to be determined by oxidative stress. Permanent exposure to oxygen radicals would cause the progressive deterioration of the RBC membrane [16–19], which would eventually mark the cell as a target for phagocytosis [20]. The duration of RBCs in the blood would depend on the levels of antioxidants they inherit from their erythroid precursors [21–23]. In consequence, the regularity of RBC lifespan among mammals would result from a characteristic, species-specific balance between oxidative stress and antioxidants. Under this model, the duration of RBCs would be already fixed when they first enter the blood, so the homeostatic control of the lifespan of circulating RBCs would be unlikely.

In this work, we suggest an alternative explanation for RBC lifespan. It is well-known that oxidative stress causes the translocation of phosphatidylserine (PS) from the inner to the outer layer of the cell membrane [24–26]. Externalized PS acts as an “eat-me” signal that fosters RBC phagocytosis [20, 27, 28], which seems to confirm that RBC lifespan is actually governed by oxidative stress. However, the phagocytic activity of sinusoidal macrophages is not only dictated by PS. CD47 delivers “don’t-eat-me” signals that counterbalance the effect of PS, preventing the destruction of the RBC [29, 30]. Moreover, “eat” and “don’t-eat” signals must be conveyed from the RBC membrane to the macrophage cytoplasm. This task relies on specific macrophage receptors that bind PS and CD47, such as Axl, Tim4, or Stabilin-2 [27], and SIRP- $\alpha$  [31–33] respectively. Without these receptors, sinusoidal macrophages would be unresponsive to RBC signals.

Whereas PS externalization may be driven by oxidative stress [34], the levels of CD47 or SIRP- $\alpha$  can be subject to regulation [35], which provides ample opportunities for RBC lifespan modulation. In this work, we show that the levels of CD47 expression in newly formed cells predetermine their duration in the blood (as suggested in [36]). Short-term changes in the number of SIRP- $\alpha$  receptors in macrophages continuously fine-tune this predefined lifespan in circulating RBCs. Furthermore, we show that EPO controls these mechanisms of RBC lifespan determination. High EPO levels upregulate CD47 in newly formed RBCs and SIRP- $\alpha$  in macrophages, thus lengthening the lifespan of circulating cells, while hyperoxia has the opposite effect. Remarkably, EPO also controls the initiation of autoimmune responses against healthy RBCs, which further contributes to rapidly reducing lifespan during hyperoxia. These results evidence that the organism adapts RBC lifespan, and consequently the rate of RBC destruction, to the conditions of oxygen availability.

To the best of our knowledge, this is the first report of EPO and autoimmunity controlling the rate of RBC destruction. From our results, a new paradigm emerges in which lifespan determination plays a key role in RBC homeostasis. This approach opens the way to a better understanding of the physiological adaptations triggered by sports training, altitude acclimation, or spatial flights [37, 38]. It also suggests that lifespan imbalances might contribute to worsening clinical conditions such as anemia, myelodysplastic syndromes, or malaria infections [39, 40].

## Results

### Effect of constant and adaptive lifespan on the homeostasis of red blood cells

In this section, we will explore how fixed and variable lifespans affect RBC dynamics. To do that, let us first assume a constant lifespan  $\bar{L}$ . Under this assumption, the cells present in the blood at any time  $t$  are those that have been formed between  $t - \bar{L}$  and  $t$ , since all the RBCs formed before  $t - \bar{L}$  are no longer alive. If  $r(t)$  denotes the number of RBCs at time  $t$ , we have that:

$$r(t) = \int_{t-\bar{L}}^t r_{\tau}(t) d\tau, \quad (1)$$

where  $r_{\tau}(t)$  is the number of RBCs born at time  $\tau$  that are in the blood at time  $t$ . Labeling the production of RBCs at time  $t$  as  $p(t)$  and assuming that RBCs can also be destroyed through non-homeostatic pathways at rate

$\mu \geq 0$  (eg. through eryptosis, hemorrhages, infections, hemolysis, ...), we can write:

$$\begin{cases} r'_\tau(t) = -\mu r_\tau(t) \\ r_\tau(\tau) = p(\tau) \end{cases}, \text{ for } \tau \leq t \leq \tau + \bar{L},$$

Integrating this equation, we get:

$$r_\tau(t) = p(\tau)e^{-\mu(t-\tau)}, \text{ for } \tau \leq t \leq \tau + \bar{L}$$

Hence, Equation 1 can be written as:

$$r(t) = \int_{t-\bar{L}}^t p(\tau)e^{-\mu(t-\tau)} d\tau,$$

Therefore, the dynamics of the RBC population are given by:

$$r'(t) = p(t) - e^{-\mu\bar{L}}p(t-\bar{L}) - \mu r(t). \quad (2)$$

Assuming that RBC lifespan  $L(t)$  is variable and using the same arguments, we get:

$$r'(t) = p(t) - e^{-\mu L(t)}p(t-L(t))(1-L'(t)) - \mu r(t) \quad (3)$$

Equations 2 and 3 show that constant and variable lifespans differ in their effect on the rate of cell destruction. To clarify this point, let us assume that  $\mu = 0$  (i.e. that RBCs are only destroyed through homeostatic pathways). The dynamics of the population can be written as:

$$r'(t) = p(t) - d(t),$$

where  $d(t)$  is the rate of RBC destruction at time  $t$ .

If lifespan is constant ( $L(t) = \bar{L}$ ), then:

$$d(t) = p(t - \bar{L})$$

In this scenario, the cells that are phagocytized at a given time  $t$  are those that were formed at time  $t - \bar{L}$ . In consequence, the rate of cell destruction is univocally determined by past rates of cell production. Conversely, changing lifespan at time  $t$  (i.e. making  $L'(t) \neq 0$ ) instantly changes the rate of RBC destruction:

$$d(t) = p(t - L(t))(1 - L'(t)).$$

Therefore, in populations with constant lifespans, the number of cells can only vary through changes in the rate of cell production whereas populations with variable lifespans can also resort to changes in the rate of cell destruction. To understand the consequences of this difference on the dynamics of RBC populations, we will next formulate a model for the rate of cell production. Denoting by  $K(t)$  the number of RBCs needed at time  $t$  to ensure the oxygenation of the body tissues, RBC production can be modeled as

$$p'(t) = \lambda(K(t) - r(t)), \quad (4)$$

for a positive parameter  $\lambda$ . This model assumes that RBC production increases when the number of cells is below the needs of the body and decreases otherwise. Putting equations 2 and 4 together, the dynamics of RBCs populations with constant lifespans can be modeled as follows:

$$\begin{cases} r'(t) = p(t) - e^{-\mu\bar{L}}p(t-\bar{L}) - \mu r(t) \\ p'(t) = \lambda(K(t) - r(t)). \end{cases} \quad (\text{Model 1})$$

Finally, to simulate the dynamics of populations with variable lifespans, we will use the following model:

$$L''(t) = \rho(\bar{L} - L(t)) - \sigma L'(t) + \omega(K(t) - r(t)),$$

for positive parameters  $\rho$ ,  $\sigma$ , and  $\omega$ . This model assumes that lifespan oscillates around a fixed value  $\bar{L}$  and that its changes are driven by the difference between the number of RBCs ( $r(t)$ ) and the needs of the body ( $K(t)$ ). According to this model, RBC lifespan is elastic, with greater values of parameter  $\rho$  corresponding to more flexible lifespans. Under this assumption, the dynamics of RBC populations with variable lifespans are given by:

$$\begin{cases} r'(t) = p(t) - e^{-\mu L(t)} p(t - L(t))(1 - L'(t)) - \mu r(t) \\ p'(t) = \lambda(K(t) - r(t)) \\ L''(t) = \rho(\bar{L} - L(t)) - \sigma L'(t) + \omega(K(t) - r(t)). \end{cases} \quad (\text{Model 2})$$

The previous models allow comparing the effects of constant and variable lifespans on RBC homeostasis. Numerical simulations of **Model 1** show that populations with constant lifespans exhibit delayed responses if RBC demand falls and tend to overcompensate, which creates long-lasting oscillations in the number of cells (Fig. 1.A). In these circumstances, diminished RBC production does not suffice to contract the population rapidly enough (Fig. 1.B). Increasing RBC demand triggers symmetrical behaviors, with longer lifespans creating greater delays and more pronounced oscillations (Figs. 1.C,D).

In view of the previous results, shorter lifespans seem better homeostatic solutions since they reduce the inertia of the population, providing faster adaptations to changes in RBC demand. However, shorter lifespans also entail a greater cost for the organism, since they require higher rates of RBC production to satisfy a given demand  $\bar{K}$ . From **Model 1**, the rate of RBC production at the equilibrium ( $\bar{p}$ ) in the absence of non-homeostatic mortality (i.e.  $\mu = 0$ ) is given by:

$$\bar{p} = \frac{\bar{K}}{\bar{L}},$$

which is greater for lower values of  $\bar{L}$ . The non-homeostatic mortality of RBCs entails an additional cost for the organism. In this case ( $\mu > 0$ ), the rate of cell production becomes:

$$\bar{p} = \frac{\bar{K}}{\bar{L}} \left( \frac{\mu \bar{L}}{1 - e^{-\mu \bar{L}}} \right),$$

which is also larger for shorter lifespans.

In summary, **Model 1** evidences that lifespan affects two different dimensions of RBC homeostasis: the cost of cell production and the inertia of the population to changes in RBC demand. Under a constant lifespan, both aspects are inversely related: reducing the cost of production increases inertia and vice versa. **Model 2** shows that flexible RBC lifespans uncouple both dimensions, creating less inertia and providing better homeostatic adjustments (Figs. 1.E,F) with smaller changes in RBC production (Figs. 1.G,H). Constant and variable lifespans also differ greatly in the case of hemorrhages. In populations with constant lifespans, rising cell production does not suffice to compensate for cell loss and the system oscillates sharply before returning to normality (Fig. 1.J). Variable lifespans accelerate the recovery of the population (Fig. 1.K), with more flexible lifespans entailing lower hemorrhage-derived costs, i.e. smaller increases in RBC production (Fig. 1.L).

**Model 2** assumes that lifespan is flexible and adaptive, i.e. it changes depending on the difference between RBC demand and availability. Fig. 1 shows that this logic confers a remarkable homeostatic plasticity. The question arises of whether flexible and adaptive RBC lifespans are within reach of the organism. We will address this issue in the following sections.

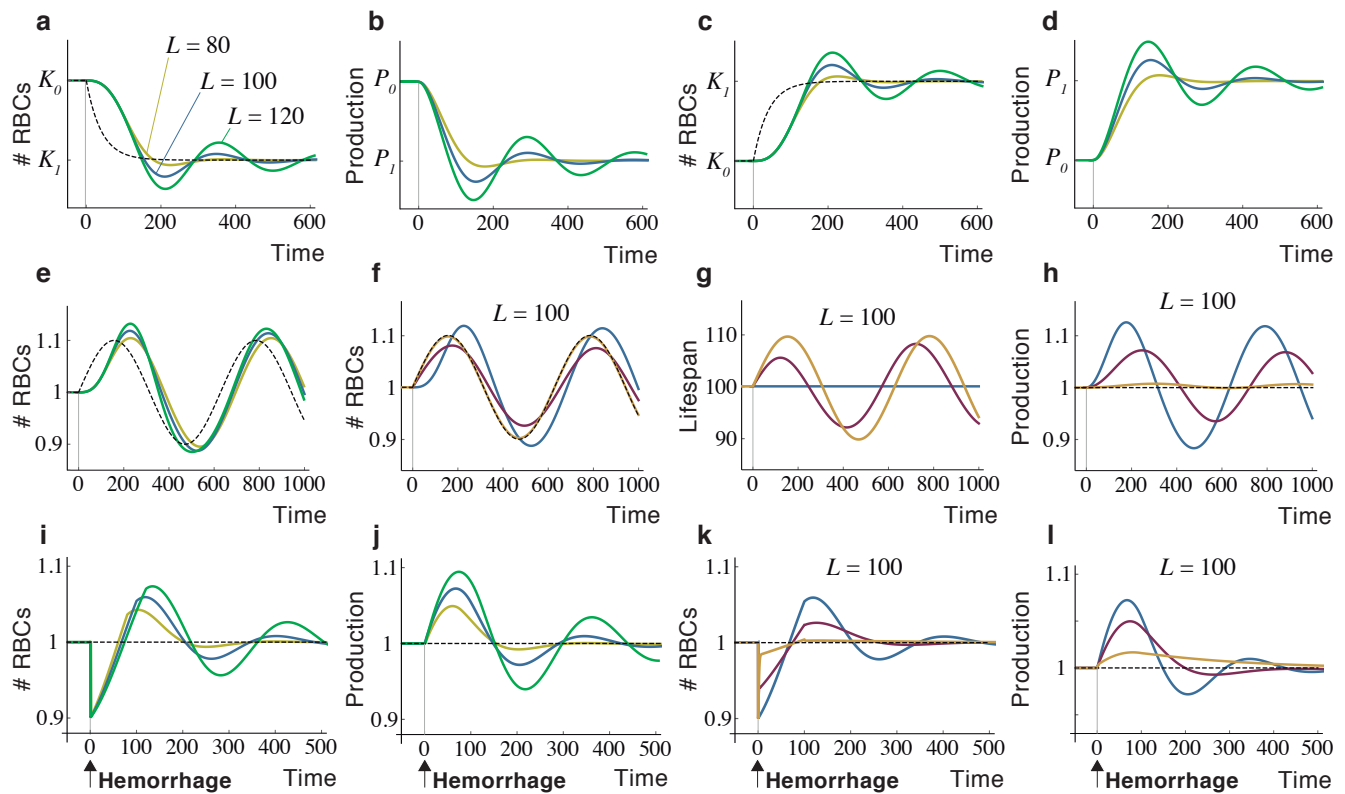

**Figure 1. Dynamics of RBC populations under constant and variable lifespans.** A,B) Response of the number (A) and production (B) of RBCs with constant lifespans to a drop in demand. RBC production in each scenario is normalized to its initial value. C,D) Dynamics of the number (C) and production (D) of RBCs after a rise in demand under constant lifespans. E,F) Response to RBC populations with constant (E) and flexible (F) lifespans to oscillations in the demand. (The behavior of a population with a constant lifespan  $L = 100$  is shown in blue for comparison in F). G,H) Changes in RBC lifespan (G) and production (H) induced by the variations in RBC demand shown in F. Greater changes in lifespan provide better homeostatic adjustments (as shown in F) with smaller variations in RBC production. I,J) Effect of hemorrhages on the number (I) and production (J) of RBCs with constant lifespans. K,L) Response of the number (K) and production (L) of RBCs with flexible lifespan to hemorrhages. The dynamics of RBCs with a constant lifespan are shown in blue for comparison.  $L =$  lifespan. Model parameters:  $\lambda = 2 \times 10^{-4}$ ,  $\mu = 0$ ,  $\rho = 5$  (yellow line in Fig. 1) and 0.2 (red line),  $\sigma = 0.1$ ,  $\omega = 10^{-3}$ , and  $\bar{K} = 10^5$ .

### Mechanisms of red blood cell lifespan determination

RBCs passing through the splenic and hepatic sinusoids engage in transient cell-to-cell interactions with resident macrophages [27]. These interactions determine the fate of RBCs in two different ways. Sinusoidal macrophages phagocytize RBCs in which the effect of PS outbalances that of CD47 [33]. Splenic macrophages also remove RBCs whose CD47 expression is below a critical level, regardless of the amount of PS in their membrane [41]. In this case, splenic macrophages activate an autoimmune response that induces the production of anti-RBC antibodies [30, 36, 41–43]. (The consequences of this response will be addressed in later sections.) The previous conditions control two alternative phagocytosis pathways that differ in their consequences on the subsequent macrophage behavior. We will refer to both phagocytosis pathways as “silent” (meaning that it does not trigger autoimmunity) and “immune” respectively [36].

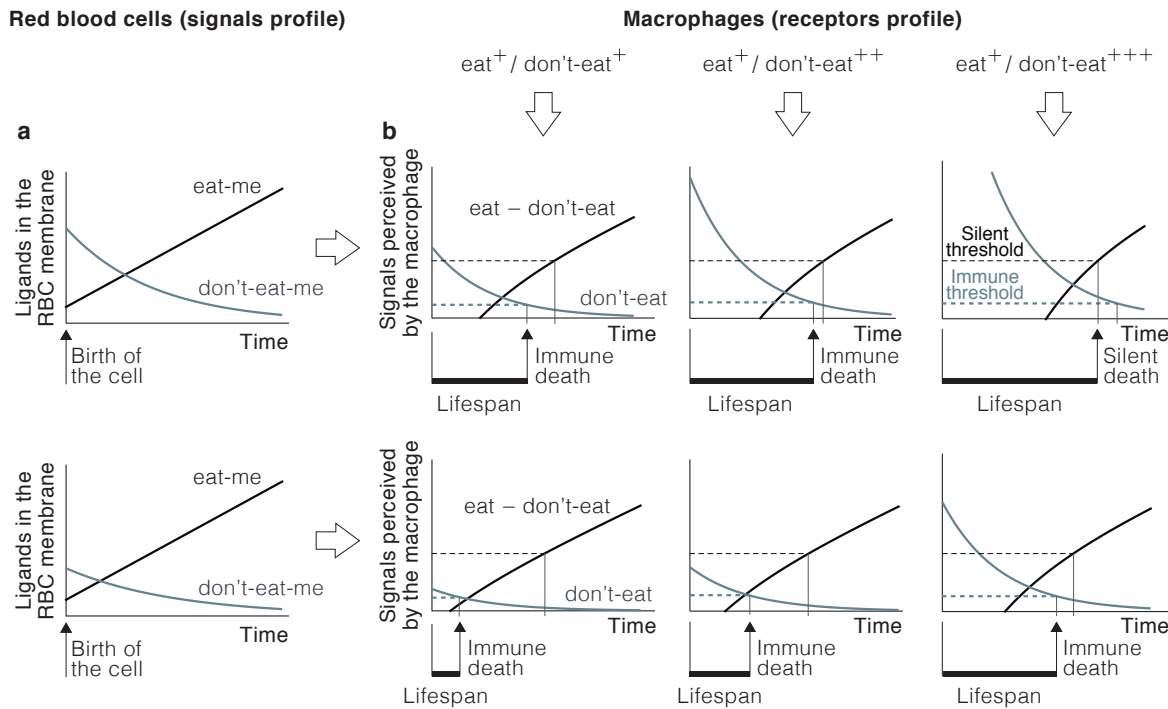

**Figure 2. Variability of RBC fate and lifespan.** A) Dynamics of “eat-me” and “don’t-eat-me” signals in two RBCs that differ in their initial expression of the latter. B) Outcomes of the interaction of RBCs in A with macrophages expressing different levels of “don’t-eat” receptors. RBCs undergo the silent pathway if the difference between the number of “eat” and “don’t-eat” signals perceived by the macrophage is above a critical threshold (silent threshold) and the immune pathway if the number of “don’t” eat signals does not reach a minimum value (immune threshold). Macrophages with low or medium levels of “don’t-eat” receptors (left and middle column respectively) phagocytize both RBCs through the immune pathway. However, the timing of the phagocytosis is different, which translates into heterogeneous lifespans. If macrophages express more “don’t-eat” receptors (right column) the lifespan of both RBCs is longer. In this case, the first one (top line) is now phagocytized through the silent pathway.

Denoting by  $s_E$  and  $s_D$  the number of “eat” and “don’-eat” signals delivered by PS and CD47 to the macrophage, the conditions that trigger RBC phagocytosis can be expressed as

$$s_E - s_D \geq T_S \quad (\text{Condition 1})$$

and

$$s_D \leq T_I, \quad (\text{Condition 2})$$

for certain values  $T_S$  (“silent” threshold) and  $T_I$  (“immune” threshold). The expression of PS and CD47 changes with the age of the RBC [44]: PS increases with time [45, 46] and CD47 disappears progressively from the membrane [29, 47]. These dynamics can be modeled as follows [36]:

$$\begin{cases} D(t) = D_0 e^{-\alpha t} \\ E(t) = E_0 + \beta t \\ D(0) = D_0 \\ E(0) = E_0, \end{cases} \quad (5)$$

where  $t$  is the age of the RBC,  $E(t)$  and  $D(t)$  denote PS and CD47 expression respectively, and  $\alpha$  and  $\beta$  are positive parameters (see [36] for further details about the meaning of the parameters)(Fig. 2.A).

The number of “eat” and “don’t-eat” signals perceived by a macrophage not only depend on how much PS and CD47 is in the RBC surface but also on how many PS and CD47 receptors it has its membrane ( $r_E$  and  $r_D$  respectively). This dependence can be modeled as follows:

$$\begin{cases} s_D = \delta_D r_D D(t) \\ s_E = \delta_E r_E E(t), \end{cases} \quad (6)$$

where  $\delta_E$  and  $\delta_D$  are positive parameters. For the sake of simplicity and without loss of generality, we will take  $\delta_E = \delta_D = 1$ .

Equations 5 and 6, together with Conditions 1 and 2, model the outcome of RBC/macrophage interactions. Numerical simulations of this model show that variations in the profile of macrophage receptors or in the dynamics of PS and CD47 in the RBC entail sharp differences both in the phagocytosis pathway undergone by RBCs and their lifespans (Fig. 2.B).

These results show that assuming oxidation-driven PS externalization as the main cause of RBC phagocytosis is overly simplistic (we remark that RBCs in Fig. 2 do not differ in PS expression). They also show that RBC lifespan is unlikely to be fixed. This would require that the number of receptors be identical in all sinusoidal macrophages at all times. Also, CD47 and PS dynamics should be equal in all RBCs. Otherwise, RBC lifespan is necessarily variable. Can this variability be used by the organism a homeostatic mechanism? We address this question in the next section.

### Role of adaptive lifespan in the homeostasis of red blood cells

Taking equations 6 into account, Conditions 1 and 2 can be rewritten as

$$r_E E(t) \geq T_S + r_D D(t) \quad (\text{Condition 1})$$

and

$$r_D D(t) \geq T_I. \quad (\text{Condition 2})$$

From the previous expressions it is possible to determine at what age are RBCs destroyed by macrophages. Denoting by  $t_S$  and  $t_I$  the times at which RBCs are phagocytized through the silent and the immune pathways respectively, we have that:

$$t_S = t \text{ such that } r_E E(t) = T_S + r_D D(t)$$

and:

$$t_I = t \text{ such that } r_D D(t) = T_I$$

Replacing  $E(t)$  and  $D(t)$  by their values given by Equation 5 gives explicit expressions for  $t_S$  and  $t_I$ :

$$\begin{cases} t_S = \frac{T_S - r_E E_0}{\beta r_E} + \frac{1}{\alpha} W \left( \frac{\alpha r_D D_0}{\beta r_E} e^{\frac{\alpha(r_E E_0 - T_S)}{\beta r_E}} \right) \\ t_I = \frac{1}{\alpha} \ln \left( \frac{r_D D_0}{T_I} \right) \end{cases} \quad (\text{Model 3})$$

where  $W(x)$  is the Lambert function.

When a RBC of age  $t$  interacts with hepatic or splenic macrophages it is phagocytized through the silent pathway if  $t = t_S < t_I$  and through the immune pathway if  $t = t_I < t_S$ . If  $t < t_I$  and  $t < t_S$ , the RBC continues to circulate in the blood. According to Model 3, these conditions depend on how much PS and CD47 the RBC expressed when it was formed ( $E_0$  and  $D_0$ ) and on the number of PS and CD47 receptors ( $r_E$  and  $r_D$ ) in the macrophages it encounters when passing through the sinusoids. To illustrate the explicative power of our approach, we will focus on how  $D_0$  (CD47 expression in newly formed RBCs) and  $r_D$  (SIRP- $\alpha$  expression in macrophages) determine the fate and lifespan of RBCs. To do that, hereafter we will assume that  $E_0$  and  $r_E$  are constant.

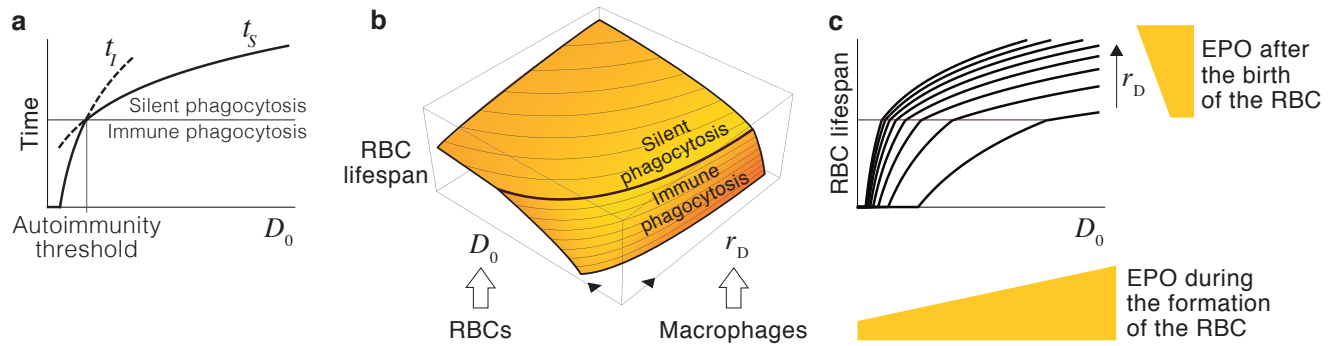

**Figure 3. Homeostatic control of adaptive RBC lifespan.** A) Effect of  $D_0$  on the fate and lifespan of RBCs. B) Combined effect of  $D_0$  and  $r_D$  on the fate and lifespan of RBCs. The black thick line represents the autoimmunity threshold. C) We hypothesize that i) the concentration of EPO during the formation of the cell determines how much CD47 it expresses when it enters the blood ( $D_0$ ), and ii) the concentration of EPO during the life of the RBC controls SIRP- $\alpha$  expression in macrophages ( $r_D$ ).

In this scenario, for a given level of SIRP- $\alpha$  expression in macrophages ( $r_D$ ), the fate of RBCs only depends on  $D_0$ . For RBCs with high values of  $D_0$ , we have that  $t_S < t_I$ , so they are phagocytized through the silent pathway. RBCs with  $D_0$  below a certain threshold (labeled as autoimmunity threshold) verify that  $t_I < t_S$ , so they undergo the immune pathway instead. Since each RBC can only be phagocytized once, the first condition to be fulfilled determines its fate. Therefore, RBC lifespan is given by  $L = \min(t_S, t_I)$  (see Fig. 3.A). From this result it follows that the lifespan of RBCs is predetermined by their level of CD47 expression when they egress the bone marrow. This predefined lifespan can be modulated once they are in circulation by changes in the number of SIRP- $\alpha$  receptors in macrophages (Fig. 3.B).

We suggest that CD47 and SIRP- $\alpha$  define a mechanism of adaptive lifespan that determines the duration of RBCs depending on the difference between RBC demand and availability. As shown in Fig. 1, this is an effective homeostatic strategy to control RBC populations. We hypothesize that this mechanism is regulated by EPO. In particular, we suggest that EPO conditions the expression of CD47 in newly formed RBCs and of SIRP- $\alpha$  in macrophages (Fig. 3.C). Under this hypothesis, RBCs are sensitive to EPO in two different ways. The levels of EPO during the development of RBCs in the bone marrow determine their expected lifespan by defining their level of CD47 expression when they enter circulation (as suggested in [36]). Once in the blood, EPO-induced changes in the number of macrophage receptors continuously fine-tune this predefined lifespan.

Under our hypothesis, the rise in the concentration of EPO in response to low oxygen levels would lengthen lifespan, reducing the rate of RBC destruction. This effect, together with the EPO-induced boost in RBC production would increase the number of cells in the blood (see Equation 3). Conversely, low EPO levels would shorten RBC lifespan, increasing the destruction of RBCs in the liver and the spleen and therefore reducing the size of the population. The effect of EPO on CD47 and SIRP- $\alpha$  would also lead to changes in the autoimmunity threshold (Fig. 3.C). Low EPO levels would increase the likelihood of immune phagocytosis, which could eventually trigger anti-RBC autoimmune responses. This would accelerate the destruction of RBCs that are no longer needed by the organism. In the next section, we will explore the homeostatic role of this new mechanism of EPO-mediated autoimmunity.

### Role of autoimmunity in the homeostasis of red blood cells

The phagocytosis of RBCs with low CD47 expression triggers autoimmune responses that target circulating RBCs [30, 41–43]. Under our hypothesis, this is likely to occur when EPO levels are low (Fig. 4.A), a clear indicator of an excess of oxygen in the tissues. We suggest that autoimmunity is a homeostatic strategy to rapidly reduce the number of RBCs in these circumstances [36]. It has been suggested that immunity might play similar roles in the homeostatic control of other tissues [48, 49]. To illustrate the operation of this mechanism in the particular case of



RBC populations, will model how auto-antibodies affect the fate and lifespan of RBCs.

Oposonized RBCs are recognized by macrophages through specific membrane receptors that bind the  $F_c$  region of antibodies. These receptors act as “eat” signals that foster the phagocytosis of oposonized cells [33]. It has been observed that CD47 inhibits phagocytosis of oposonized RBCs in a dose-dependent manner [50], which implies that macrophages integrate oposonization-derived signals with the rest of “eat” and “don’t-eat” signals delivered by the membrane of the RBC [33, 51]. This integration that can be modeled as follows:

$$\begin{cases} s_D = \delta_D r_D D(t) \\ s_E = \delta_E r_E E(t) + \delta_A, \end{cases}$$

where  $\delta_A$  is a positive parameter that represents the degree of oposonization of the RBC.

From Conditions 1 and 2 above, the lifespan of oposonized RBCs is given by:

$$\begin{cases} t_S = \frac{T_S - r_E E_0 - \delta_A}{\beta r_E} + \frac{1}{\alpha} W \left( \frac{\alpha r_D D_0}{\beta r_E} e^{\frac{\alpha(r_E E_0 - T_S + \delta_A)}{\beta r_E}} \right) \\ t_I = \frac{1}{\alpha} \ln \left( \frac{r_D D_0}{T_I} \right) \\ L = \min(t_S, t_I), \end{cases} \quad (\text{Model 4})$$

where  $W(x)$  is the Lambert function.

According to [Model 4](#), anti-RBC autoimmune responses does not cause the indiscriminate destruction of oposonized cells. Instead, they shorten the lifespan of circulating cells in proportion to their degree of oposonization (Fig. 4.B). We suggest that this provides a homeostatic mechanism, regulated by EPO, intended to provoke a controlled reduction in the number of RBCs.

Under this assumption, diminished EPO levels caused by an excess of oxygen would downregulate SIRP- $\alpha$  receptors in macrophages, shortening RBC lifespan, and inducing the immune phagocytosis of some RBCs. This would trigger anti-RBC autoimmune responses, which would further reduce the lifespan of circulating cells. The intensity of these responses would depend on the number of RBCs phagocytized through the immune pathway at any time, which in turn would be proportional to the drop in the concentration of EPO.

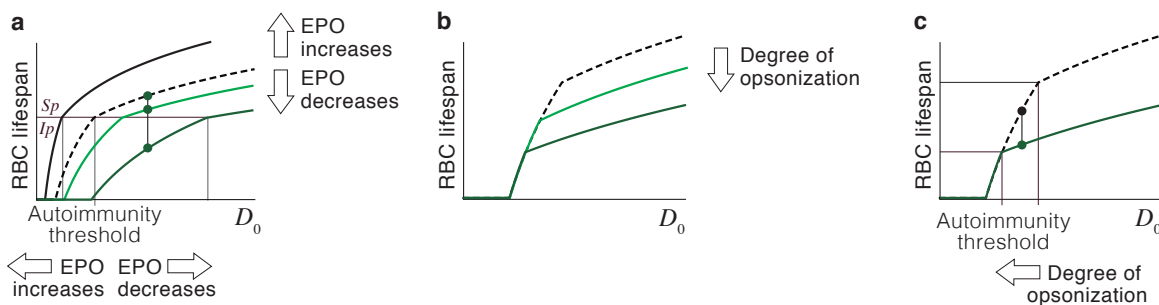

**Figure 4. Role of autoimmunity in RBC homeostasis.** A) An increase in EPO prolongs the duration of RBCs (from the dashed line to the solid black line) and displaces the autoimmunity threshold towards lower values of  $D_0$ , which reduces the likelihood of immune phagocytosis. A drop in the levels of EPO entails shorter lifespans (from the dashed line to the solid light green line). For very low EPO levels, RBCs predestined to undergo silent phagocytosis are removed through the immune pathway instead (dark green line). B) According to [Model 4](#), auto-antibodies reduce the lifespan of RBCs, an effect that increases with the degree of oposonization. C) Oposonization also displaces the autoimmunity threshold towards greater values of  $D_0$ . RBCs that would undergo the immune pathway (black circle) are destroyed through the silent pathway when oposonized (green circle). This implies that the lifespan of oposonized RBCs is shorter but they are less likely to be phagocytized through the immune pathway. The dashed black line in B and C corresponds to non-oposonized RBCs.

The contraction of the RBC population caused by shortened lifespan would restore oxygen and EPO levels to normal. This would hinder the immune phagocytosis of non-opsonized RBCs (Fig. 4.A). Opsonized RBCs would also be less likely to undergo this phagocytosis pathway (Fig. 4.C). Eventually, all RBCs would be removed through the silent pathway, ending the production of anti-RBC antibodies. Therefore, homeostatic autoimmunity would contribute to a controlled reduction of the number of RBCs. This would be a reversible process, operating only while EPO levels remain below normal.

### The role of EPO in the adaptive lifespan of red blood cells

In the previous section, we hypothesized that EPO controls RBC lifespan by modulating the expression of key molecules on RBCs and macrophages. This would confer the organism effective control over the number of RBCs in the blood. In this section, we provide empirical evidence to support this new homeostatic role of EPO as a major determinant of RBC lifespan.

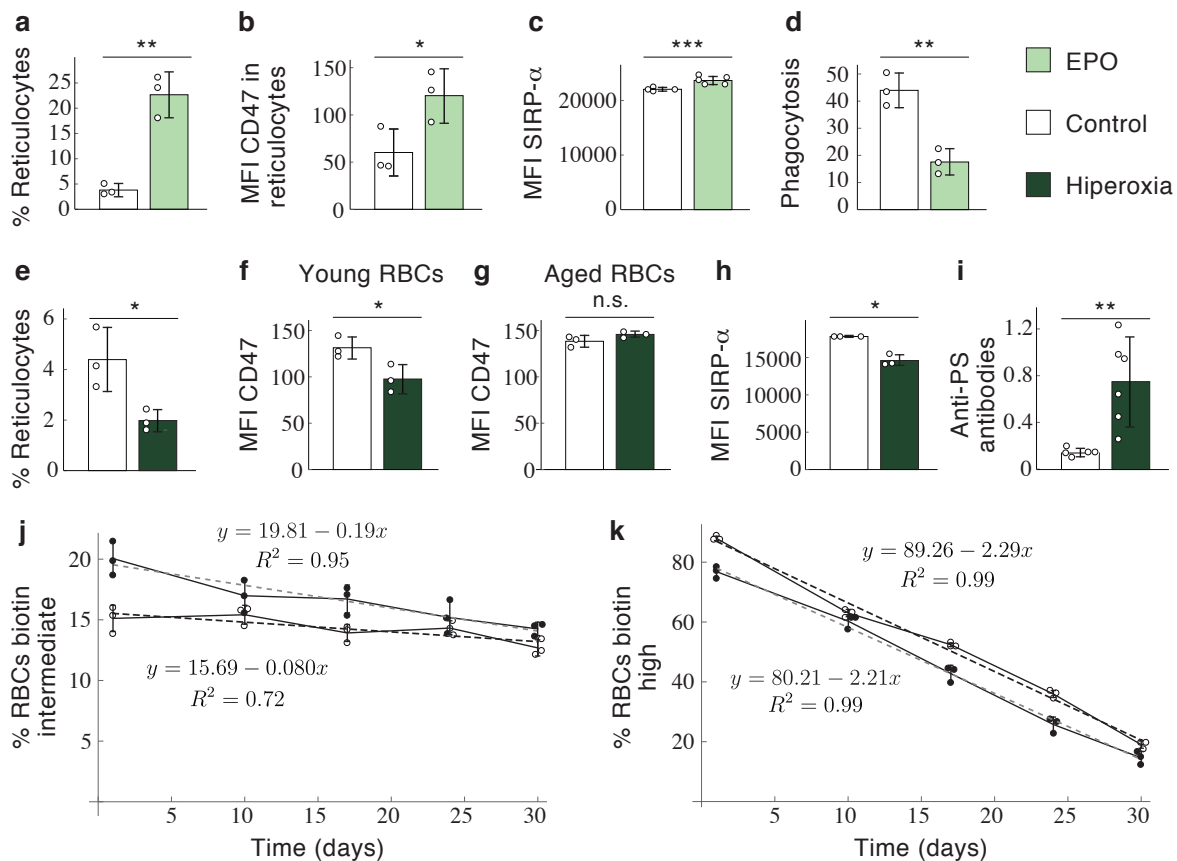

**Figure 5. The role of EPO in RBC lifespan determination.** A-C) *In vivo* effects of EPO on the production of reticulocytes (A), CD47 expression in newly formed RBCs (B), and number of SIRP- $\alpha$  receptors in macrophages of the hepatic sinusoids (C). D) *In vitro* effect of EPO on the phagocytosis of RBCs by sinusoidal macrophages. E-I) *In vivo* effects of hyperoxia on the production of reticulocytes (E), CD47 expression in RBCs formed during (biotin intermediate) and before (biotin high) hyperoxia (F and G respectively), SIRP- $\alpha$  receptors in macrophages of the hepatic sinusoids (H), and production of anti-RBC antibodies (I). J-K) Monitoring of biotin intermediate and biotin high RBCs after the hyperoxia treatment. Solid dots: hyperoxia mice; white dots: control mice. A:  $p = 0.0016$ ,  $CI = (-28.45, -9.28)$ ; B:  $p = 0.0433$ ,  $CI = (-120.08, -2.58)$ ; C:  $p = 0.0002$ ,  $CI = (-980.15, -623.18)$ ; D:  $p = 0.0038$ ,  $CI = (13.88, 38.79)$ ; E:  $p = 0.0298$ ,  $CI = (-0.26, 6.21)$ ; F:  $p = 0.0363$ ,  $CI = (2.72, 64.75)$ ; G:  $p = 0.1374$ ,  $CI = (-20.48, 5.15)$ ; H:  $p = 0.0176$ ,  $CI = (1341.47, 5039.20)$ ; I:  $p = 0.0095$ ,  $CI = (-0.99, -0.22)$ .  $DI$  = Mean difference confidence interval.

It is well known that low oxygen availability rises the concentration of EPO, which in turn increases the rate of RBC production in the bone marrow [52]. We suggest that this effect is accompanied by an increase in RBC lifespan that reduces the rate of cell destruction (see Equation 3) and contributes to a net increase in the number of cells (Fig. 1). Conversely, a drop in the concentration of EPO would shorten lifespan and trigger the production of auto-antibodies against circulating RBCs, thus increasing the rate of cell destruction. To test these hypotheses, we treated mice with EPO (see Methods). As expected, EPO raised the rate of RBC production, increasing the percentage of reticulocytes in the blood (Fig. 5.A). In agreement with our hypotheses, this effect was accompanied by the upregulation of CD47 in the reticulocytes of EPO-treated mice (Fig. 5.B) and also of SIRP- $\alpha$  receptors in the sinusoidal macrophages of the liver (Fig. 5.C). According to our model of RBC lifespan determination, the upregulation of SIRP- $\alpha$  would amplify the perception of “don’t-eat” signals by macrophages, reducing their phagocytic activity. In agreement with this prediction, RBC phagocytosis was sharply reduced in macrophages treated *in vitro* with EPO (Fig. 5.D). Taken together, these results evidence that increasing EPO levels lengthens RBC lifespan.

Then, we analyzed the effects of hyperoxia (see Methods). As expected under our hypotheses, these conditions did not only lower the percentage of reticulocytes in the blood (Fig. 5.E) but also their levels of CD47 expression (Fig. 5.F). Importantly, CD47 expression was not changed in the RBCs formed before the hyperoxia treatment (Fig. 5.G), which shows that EPO only affects CD47 expression in newly formed RBCs. Also in agreement with our hypotheses, hyperoxia downregulated the number of SIRP- $\alpha$  receptors in macrophages (Fig. 5.H) and led to a dramatic increment in the production of anti-PS antibodies (Fig. 5.I). These antibodies opsonize RBCs, facilitating their phagocytosis by sinusoidal macrophages [40]. The previous results support the hypothesis that the organism responds to an excess of oxygen in the tissues by shortening the RBC lifespan.

According to Model 3, RBCs formed with low CD47 expression during hyperoxia (Fig. 5.F) should exhibit shorter lifespans as compared to control RBCs (Fig. 3). This prediction was confirmed by monitoring the fate of RBCs in the blood after returning to normal oxygen levels. RBCs formed in hyperoxia underwent a three-fold increase in their rate of removal as compared to control mice (Fig. 5.J). In contrast, the rate of removal of RBCs formed before hyperoxia did not show any difference with RBCs from control mice (Fig. 5.K), as should be expected from their similar levels of CD47 expression (Fig. 5.G).

Overall, these data reveal a new homeostatic role of EPO: it determines the expression of CD47 and SIRP- $\alpha$  receptors in newly formed RBCs and macrophages respectively, and therefore controls the lifespan of circulating RBCs. The production of anti-RBC antibodies in hyperoxia further contribute to shortening RBC lifespan. A conclusion that can be drawn from these results is that EPO not only controls the rate at which RBCs are produced in the bone marrow but also the rate at which they are removed by sinusoidal macrophages. To the best of our knowledge, this is the first report of adaptive RBC lifespan as a key homeostatic element regulated by EPO and EPO-induced autoimmunity.

## Discussion

The current paradigm of RBC homeostasis is based on two main assumptions: EPO regulates the production of new cells in the bone marrow [15, 53], and sinusoidal macrophages remove RBCs from the blood when they attain a certain species-specific age [54]. Qualitatively, these elements seem to provide a sound explanation for the control of RBC populations. The rate of cell production would be determined by a feedback mechanism that adjusts blood EPO levels depending on the availability of oxygen. Oxidative stress would progressively deteriorate RBCs, and the appearance of senescence signs would allow macrophages to identify and destroy aged cells (Fig. 6.A).

In this work, we show that a quantitative formulation of this model reveals critical limitations that are not obvious in its qualitative counterpart, and suggest an alternative view of RBC homeostasis. We identify adaptive lifespan as a key regulatory mechanism to ensure a homeostatic plasticity impossible to achieve with fixed lifespans. We show that this new mechanism is controlled by EPO through its effects on CD47 and SIRP- $\alpha$  expression and through EPO-induced autoimmunity. These elements shape a simple mechanism that allows to adapt lifespan (and consequently the rate of RBC destruction) depending on the conditions of oxygen availability (Fig. 6.B).

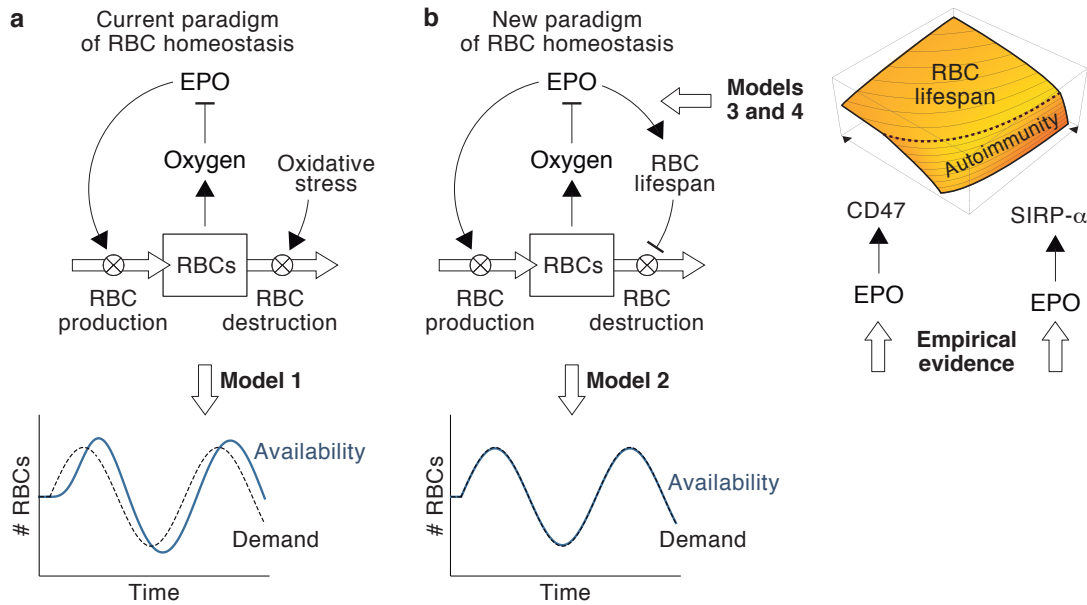

**Figure 6. A new paradigm of RBC homeostasis.** A) According to the current paradigm, EPO exclusively controls the rate of RBC production. **Model 1** shows that this assumption leads to poor homeostatic control of RBC populations when the demand of the organism changes. B) We suggest an alternative paradigm for RBC homeostasis in which EPO also controls the rate of RBC destruction by fine-tuning RBC lifespan. **Model 2** shows that adaptive lifespans provide better homeostatic adaptations to changes in the needs of the body. Our data show that EPO controls RBC lifespan by regulating CD47 and SIRP- $\alpha$  expression in reticulocytes and macrophages respectively.

The view of RBC lifespan as an EPO-mediated homeostatic mechanism implies a radical shift away from the current paradigm. The divergence between both approaches is especially patent in their explanation of neocytolysis, the destruction of young RBCs (aged only around ten days) that occurs during de-acclimation from high altitudes [55–59]. Lower levels of partial pressures of atmospheric oxygen at high altitudes imply a greater demand for RBCs. Accordingly, EPO levels increase to raise the production of new cells [60]. Returning to sea level reverses the situation, creating a transient excess of RBCs in circulation [61]. It is widely accepted that neocytolysis is intended to rapidly reduce the number of cells in the blood in this situation [57, 62–64].

The sharp reduction in RBC lifespan during neocytolysis is currently considered as a stress response triggered by high altitude hypoxia, which would make newly formed RBCs especially sensitive to oxidative damage [64–67]. For this reason, they would undergo accelerated senescence when oxygen levels return to normal [65]. From this viewpoint, hypoxia would create RBCs sensitive to oxidative stress in anticipation of an uncertain and unpredictable increase in oxygen levels. That a curtailed resistance to oxidation can be considered an active homeostatic mechanism is questionable. Creating RBCs prone to oxidative damage would be a puzzling response to hypoxia. Circulating RBCs are more necessary when oxygen availability is low. If anything, we should expect RBCs formed in hypoxia to exhibit greater resistance to failure and lower rates of functional senescence. As a matter of fact, it has been observed that RBCs formed under hypoxia exhibit longer lifespans [68].

From our approach, neocytolysis is not a stress response but the expected response to the changes in RBC demand during altitude acclimation and de-acclimation. At high altitudes, the increase in the concentrations of EPO would upregulate SIRP- $\alpha$  receptors in macrophages (7.A), lengthening lifespan to palliate the deficit of RBCs. The drop in EPO after returning to the sea would shorten RBC lifespan. This effect would be more pronounced in the newly formed RBCs that have very low levels of CD47 (Figs. 7.B,C), so young RBCs could be phagocytized while older cells are spared (Fig. 7.D). This is precisely what defines neocytolysis. In case that neocytolysis were not sufficient to achieve the needed contraction of the RBC population, the organism would resort to the production of anti-PS antibodies (Fig. 7.C). The utility of these autoantibodies would be twofold. First, they would rapidly curtail

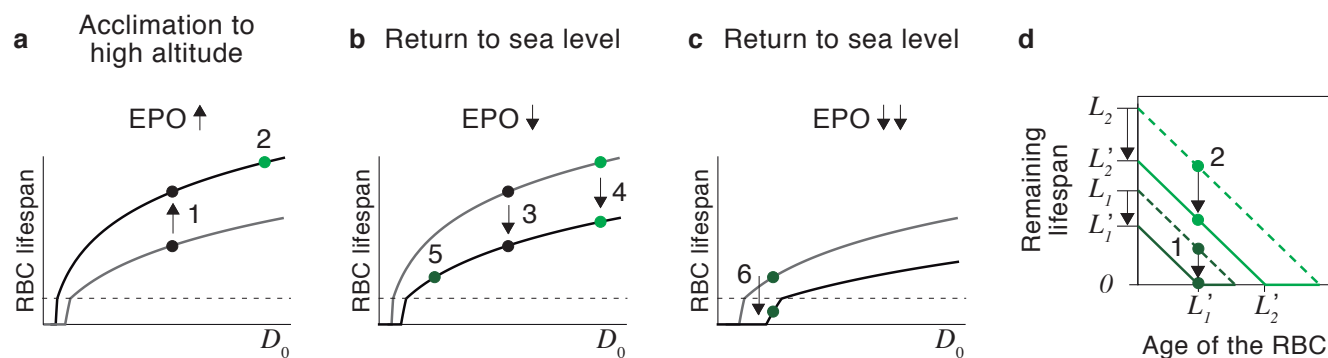

**Figure 7. The origin of neocytolysis.** A) The organism responds to lower oxygen availability at high altitudes by increasing the concentration of EPO. Within our paradigm, this would lengthen the lifespan of circulating RBCs (1), reducing their rate of destruction and contributing to increase the number of cells in the blood. New RBCs formed in these conditions would also exhibit longer predefined lifespans (2). B) Returning to sea level would entail a drop in the concentration of EPO. According to our model, this would reduce RBC lifespan (3 and 4) and cause the formation of short-lived RBCs (5). Therefore, cohorts of RBCs that differ in their expected lifespan would coexist in the blood. C) A sharp decrease in EPO levels could cause the destruction of RBCs through the immune phagocytosis, triggering an anti-RBC response, which would further reduce the lifespan of circulating cells. D) The reduction in lifespan caused by the return to normal oxygen levels entails the instantaneous destruction of RBCs that have reached a critical age. This age threshold is not absolute but relative to each cohort of RBCs depending on their expected lifespan. Short-lived die when their expected lifespan falls from  $L_1$  to  $L'_1$  (1) whereas long-lived RBCs of the same age continue to circulate in the blood (2).

the number of circulating RBCs. Second, the increase in the formation of free radicals under sustained hyperoxia would increase the likelihood of oxidative damage in the membrane of RBCs, so targeting PS in these circumstances would ensure the destruction of cells at greater risk of malfunction.

Our results reveal a rich regulatory landscape in which RBC homeostasis, an organism-level phenomenon, relies on the interplay between molecules located on the membrane of RBCs and macrophages. This gives rise to a simple and powerful organism-level mechanism, capable of adjusting the number of RBCs in the wide range of configurations that can be adopted (both at evolutionary and ontogenetic scales) by mammalian bodies. The control of RBC lifespan by EPO and autoimmunity emerges as a key homeostatic mechanism and calls for novel theoretical, experimental, and clinical approaches to this field of research. For instance, similar abnormalities in RBC lifespan determination could be in the origin of anemia in such seemingly disparate situations as spatial flights or malaria infections [36, 70].

## Acknowledgments

F.B. and C.F.A. are grateful to the Roechling Foundation for its support. Cr.F.A. and N.V.-L. were partially supported by the FCT grant no. EXPL/BIA-BIO-0644/2021. We thank the Flow Cytometry Facility of the Instituto de Medicina Molecular João Lobo Antunes and Daniela Ramalho for their technical support.

## References

1. Svoboda, O. *et al.* Dissection of vertebrate hematopoiesis using zebrafish thrombopoietin. *Blood* **124**, 220–228 (2014). DOI 10.1182/blood-2014-03-564682.
2. Liu, W. *et al.* Erythropoietin signaling in the microenvironment of tumors and healthy tissues. *Tumor Microenviron.* 17–30 (2020). DOI 10.1007/978-3-030-35582-1\_2.

3. Stockmann, C. & Fandrey, J. Hypoxia-induced erythropoietin production: A paradigm for oxygen-regulated gene expression. *Clin. Exp. Pharmacol. Physiol.* **33**, 968–979 (2006).
4. Testa, U. Apoptotic mechanisms in the control of erythropoiesis. *Leuk.* **18**, 1176–1199 (2004). DOI 10.1038/sj.leu.2403383.
5. Migliaccio, A. R. Erythroblast enucleation. *Haematol.* **95**, 1985–1988 (2010). DOI 10.3324/haematol.2010.033225.
6. Minetti, G., Achilli, C., Perotti, C. & Ciana, A. Continuous change in membrane and membrane-skeleton organization during development from proerythroblast to senescent red blood cell. *Front. Physiol.* **9**, 286 (2018). DOI 10.3389/fphys.2018.00286.
7. Dugas, E., Candé, C. & Kroemer, G. Erythrocytes: Death of a mummy. *Cell Death & Differ.* **8**, 1131–1133 (2001). DOI 10.1038/sj.cdd.4400953.
8. Holcik, M. Do mature red blood cells die by apoptosis? *Trends Genet.* **18**, 121 (2002). DOI 10.1016/S0168-9525(02)02652-5.
9. Maekawa, S. & Kato, T. Diverse of erythropoiesis responding to hypoxia and low environmental temperature in vertebrates. *BioMed Res. Int.* **2015**, e747052 (2015). DOI 10.1155/2015/747052.
10. Kämpf, S. *et al.* Aging markers in equine red blood cells. *Front. Physiol.* **10**, 893 (2019). DOI 10.3389/fphys.2019.00893.
11. Clark, M. R. Senescence of red blood cells: progress and problems. *Physiol. Rev.* **68**, 503–554 (1988). DOI 10.1152/physrev.1988.68.2.503.
12. Huang, Y.-X. *et al.* Restoring the youth of aged red blood cells and extending their lifespan in circulation by remodelling membrane sialic acid. *J. Cell. Mol. Medicine* **20**, 294–301 (2016). DOI 10.1111/jcmm.12721.
13. Koury, M. & Bondurant, M. The mechanism of erythropoietin action. *Am. J. Kidney Dis.* **18**, 20–23 (1991).
14. Bhoopalan, S. V., Huang, L. J.-s. & Weiss, M. J. Erythropoietin regulation of red blood cell production: From bench to bedside and back. *F1000Research* **9** (2020). DOI 10.12688/f1000research.26648.1.
15. Chen, K. *et al.* Resolving the distinct stages in erythroid differentiation based on dynamic changes in membrane protein expression during erythropoiesis. *Proc. Natl. Acad. Sci.* **106**, 17413–17418 (2009). DOI 10.1073/pnas.0909296106.
16. Neu, B., Sowemimo-Coker, S. O. & Meiselman, H. J. Cell-cell affinity of senescent human erythrocytes. *Biophys. J.* **85**, 75–84 (2003). DOI 10.1016/S0006-3495(03)74456-7.
17. Singh, S., Pandey, K. B. & Rizvi, S. I. Erythrocyte senescence and membrane transporters in young and old rats. *Arch. Physiol. Biochem.* **122**, 228–234 (2016). DOI 10.1080/13813455.2016.1190761.
18. Huang, Y.-X. *et al.* Human red blood cell aging: correlative changes in surface charge and cell properties. *J. Cell. Mol. Medicine* **15**, 2634–2642 (2011). DOI 10.1111/j.1582-4934.2011.01310.x.
19. Lew, V. L. *et al.* Effects of age-dependent membrane transport changes on the homeostasis of senescent human red blood cells. *Blood* **110**, 1334–1342 (2007). DOI 10.1182/blood-2006-11-057232.
20. Lee, S.-J., Park, S.-Y., Jung, M.-Y., Bae, S. M. & Kim, I.-S. Mechanism for phosphatidylserine-dependent erythrophagocytosis in mouse liver. *Blood* **117**, 5215–5223 (2011). DOI 10.1182/blood-2010-10-313239.

21. Hattangadi, S. M. & Lodish, H. F. Regulation of erythrocyte lifespan: do reactive oxygen species set the clock? *The J. Clin. Investig.* **117**, 2075–2077 (2007). DOI 10.1172/JCI32559.
22. Marinkovic, D. *et al.* Foxo3 is required for the regulation of oxidative stress in erythropoiesis. *The J. Clin. Investig.* **117**, 2133–2144 (2007). DOI 10.1172/JCI31807.
23. Lutz, H. U. & Bogdanova, A. Mechanisms tagging senescent red blood cells for clearance in healthy humans. *Front. Physiol.* **4**, 387 (2013). DOI 10.3389/fphys.2013.00387.
24. Gottlieb, Y. *et al.* Physiologically aged red blood cells undergo erythrophagocytosis in vivo but not in vitro. *Haematol.* **97**, 994–1002 (2012). DOI 10.3324/haematol.2011.057620.
25. Freikman, I., Amer, J., Cohen, J. S., Ringel, I. & Fibach, E. Oxidative stress causes membrane phospholipid rearrangement and shedding from RBC membranes—an NMR study. *Biochimica et Biophys. Acta (BBA)-Biomembranes* **1778**, 2388–2394 (2008). DOI 10.1016/j.bbamem.2008.06.008.
26. Koshkaryev, A. *et al.* Non-oxidative band-3 clustering agents cause the externalization of phosphatidylserine on erythrocyte surfaces by a calcium-independent mechanism. *Biochimica et Biophys. Acta (BBA)-Biomembranes* **1862**, 183231 (2020).
27. de Back, D. Z., Kostova, E. B., van Kraaij, M., van den Berg, T. K. & Van Bruggen, R. Of macrophages and red blood cells; a complex love story. *Front. Physiol.* **5**, 9 (2014). DOI 10.3389/fphys.2014.00009.
28. Corrons, J., Casafont, L. B. & Frasnado, E. F. Concise review: how do red blood cells born, live, and die? *Annals Hematol.* **100**, 2425–2433 (2021).
29. Oldenburg, P.-A. Role of CD47 as a marker of self on red blood cells. *Sci.* **288**, 2051–2054 (2000). DOI 10.1126/science.288.5473.2051.
30. Oldenburg, P.-A. Role of CD47 in erythroid cells and in autoimmunity. *Leuk. & Lymphoma* **45**, 1319–1327 (2004). DOI 10.1080/1042819042000201989.
31. Logtenberg, M. E., Scheeren, F. A. & Schumacher, T. N. The CD47-SIRP $\alpha$  immune checkpoint. *Immun.* **52**, 742–752 (2020). DOI 10.1016/j.immuni.2020.04.011.
32. Matozaki, T., Murata, Y., Okazawa, H. & Ohnishi, H. Functions and molecular mechanisms of the CD47–SIRP $\alpha$  signalling pathway. *Trends Cell Biol.* **19**, 72–80 (2009).
33. Kelley, S. M. & Ravichandran, K. S. Putting the brakes on phagocytosis: “don’t-eat-me” signaling in physiology and disease. *EMBO Reports* **22**, e52564 (2021). DOI 10.15252/embr.202152564.
34. Mohanty, J. G., Nagababu, E. & Rifkind, J. M. Red blood cell oxidative stress impairs oxygen delivery and induces red blood cell aging. *Front. Physiol.* **5**, 84 (2014). DOI 10.3389/fphys.2014.00084.
35. Majeti, R. *et al.* CD47 is an adverse prognostic factor and therapeutic antibody target on human acute myeloid leukemia stem cells. *Cell* **138**, 286–299 (2009). DOI 10.1016/j.cell.2009.05.046.
36. Arias, C. F. & Arias, C. F. How do red blood cells know when to die? *Royal Soc. Open Sci.* **4**, 160850 (2017). DOI 10.1098/rsos.160850.
37. Trudel, G., Shahin, N., Ramsay, T., Laneuville, O. & Louati, H. Hemolysis contributes to anemia during long-duration space flight. *Nat. Med.* **28**, 59–62 (2022). DOI 10.1038/s41591-021-01637-7.
38. Płoszczyca, K., Langfort, J. & Czuba, M. The effects of altitude training on erythropoietic response and hematological variables in adult athletes: a narrative review. *Front. Physiol.* **9**, 375 (2018). DOI 10.3389/fphys.2018.00375.

39. Eda, S. & Sherman, I. Cytoadherence of malaria-infected red blood cells involves exposure of phosphatidylserine. *Cell. Physiol. Biochem.* **12**, 373–384 (2002). DOI 10.1159/000067908.
40. Fernandez-Arias, C. *et al.* Anti-self phosphatidylserine antibodies recognize uninfected erythrocytes promoting malarial anemia. *Cell Host Microbe* **19**, 194–203 (2016). DOI 10.1016/j.chom.2016.01.009.
41. Yi, T. *et al.* Splenic dendritic cells survey red blood cells for missing self-CD47 to trigger adaptive immune responses. *Immun.* **43**, 764–775 (2015). DOI 10.1016/j.immuni.2015.08.021.
42. Lewis, S. M., Williams, A. & Eisenbarth, S. C. Structure and function of the immune system in the spleen. *Sci. Immunol.* **4**, eaau6085 (2019). DOI 10.1126/sciimmunol.aau6085.
43. Oldenborg, P.-A. Lethal autoimmune hemolytic anemia in CD47-deficient nonobese diabetic (NOD) mice. *Blood* **99**, 3500–3504 (2002). DOI 10.1182/blood.V99.10.3500.
44. Straat, M., van Bruggen, R., de Korte, D. & Juffermans, N. P. Red blood cell clearance in inflammation. *Transfus.* **39**, 353–360 (2012). DOI 10.1159/000342229.
45. Wesseling, M. C. *et al.* Phosphatidylserine exposure in human red blood cells depending on cell age. *Cell. Physiol. Biochem.* **38**, 1376–1390 (2016). DOI 10.1159/000443081.
46. Balasubramanian, K., Mirnikjoo, B. & Schroit, A. J. Regulated externalization of phosphatidylserine at the cell surface. *J. Biol. Chem.* **282**, 18357–18364 (2007). DOI 10.1074/jbc.M700202200.
47. Wang, F. *et al.* Aging-associated changes in CD47 arrangement and interaction with thrombospondin-1 on red blood cells visualized by super-resolution imaging. *Aging Cell* **19**, e13224 (2020). DOI 10.1111/ace1.13224.
48. Meizlish, M. L., Franklin, R. A., Zhou, X., & Medzhitov, R. (2021). Tissue homeostasis and inflammation. *Annual Review of Immunology*, **39**, 557-581.
49. Chovatiya, R., & Medzhitov, R. (2014). Stress, inflammation, and defense of homeostasis. *Mol. Cell*, **54**(2), 281-288.
50. Olsson, M., Nilsson, A. & Oldenborg, P.-A. Dose-dependent inhibitory effect of CD47 in macrophage uptake of IgG-opsonized murine erythrocytes. *Biochem. Biophys. Res. Commun.* **352**, 193–197 (2007). DOI 10.1016/j.bbrc.2006.11.002.
51. Suter, E. C. *et al.* Antibody: CD47 ratio regulates macrophage phagocytosis through competitive receptor phosphorylation. *Cell Reports* **36**, 109587 (2021). DOI 10.1016/j.celrep.2021.109587.
52. Tsiftoglou, A. S. Erythropoietin (EPO) as a key regulator of erythropoiesis, bone remodeling and endothelial transdifferentiation of multipotent mesenchymal stem cells (MSCs): implications in regenerative medicine. *Cells* **10**, 2140 (2021). DOI 10.3390/cells10082140.
53. Szczesny, D., Mołoniewicz, K., Markuszewski, M. J. & Wiczling, P. Proof-of-concept study on improved efficacy of rhuEPO administered as a long-term infusion in rats. *Pharmacol. Reports* **72**, 1264–1270 (2020). DOI 10.1007/s43440-020-00150-x.
54. Badior, K. E., Bloch, E. M. & Branch, D. R. A naturally present autoantibody to senescent red blood cells? *Transfus.* **62**, 1311–1312 (2022). DOI 10.1111/trf.16883.
55. Alfrey, C. P., Udden, M. M., Leach-Huntoon, C., Driscoll, T. & Pickett, M. H. Control of red blood cell mass in spaceflight. *J. Appl. Physiol.* **81**, 98–104 (1996). DOI 10.1152/jappl.1996.81.1.98.



56. Risso, A., Ciana, A., Achilli, C. & Minetti, G. Survival and senescence of human young red cells *in vitro*. *Cell. Physiol. Biochem.* **34**, 1038–1049 (2014). DOI 10.1159/000366319.
57. Rice, L. & Alfrey, C. The negative regulation of red cell mass by neocytolysis: physiologic and pathophysiologic manifestations. *Cell. Physiol. Biochem.* **15**, 245–250 (2005). DOI 10.1159/000087234.
58. Risso, A., Turello, M., Biffoni, F. & Antonutto, G. Red blood cell senescence and neocytolysis in humans after high altitude acclimatization. *Blood Cells, Mol. & Dis.* **38**, 83–92 (2007). DOI 10.1016/j.bcmd.2006.10.161.
59. Rice, L. & Gunga, H. Neocytolysis on descending the mountain and ascending into space. *Acta Physiol.* **232** (2021). DOI 10.1111/apha.13676.
60. Vizcardo-Galindo, G., León-Velarde, F. & Villafuerte, F. C. High-altitude hypoxia decreases plasma erythropoietin soluble receptor concentration in lowlanders. *High Alt. Medicine & Biol.* **21**, 92–98 (2020). DOI 10.1089/ham.2019.0118.
61. Rice, L. *et al.* Neocytolysis on descent from altitude: a newly recognized mechanism for the control of red cell mass. *Annals Intern. Medicine* **134**, 652–656 (2001). DOI 10.7326/0003-4819-134-8-200104170-00010.
62. Risso, A., Ciana, A., Achilli, C., Antonutto, G. & Minetti, G. Neocytolysis: none, one or many? A reappraisal and future perspectives. *Front. Physiol.* **0** (2014). DOI 10.3389/fphys.2014.00054.
63. Alfrey, C. P., Rice, L., Udden, M. M. & Driscoll, T. B. Neocytolysis: physiological down-regulator of red-cell mass. *The Lancet* **349**, 1389–1390 (1997). DOI 10.1016/S0140-6736(96)09208-2.
64. Mairbäurl, H. Neocytolysis: how to get rid of the extra erythrocytes formed by stress erythropoiesis upon descent from high altitude. *Front. Physiol.* **0** (2018). DOI 10.3389/fphys.2018.00345.
65. Song, J. *et al.* HIF-mediated increased ROS from reduced mitophagy and decreased catalase causes neocytolysis. *J. Mol. Medicine* **93**, 857–866 (2015). DOI 10.1007/s00109-015-1294-y.
66. Song, J. & Prchal, J. T. Evaluation of erythrocyte changes after normoxic return from hypoxia. *Methods Mol. Biol.* **1742**, 185–194 (2018). DOI 10.1007/978-1-4939-7665-2-16.
67. Song, J., Sundar, K., Gangaraju, R. & Prchal, J. T. Regulation of erythropoiesis after normoxic return from chronic sustained and intermittent hypoxia. *J. Appl. Physiol.* **123**, 1671–1675 (2017). DOI 10.1152/jappphysiol.00119.2017.
68. Tang, F. *et al.* Inhibition of suicidal erythrocyte death by chronic hypoxia. *High Alt. Med. Biol.* **20**, 112–119 (2019).
69. Khandelwal, S. & Saxena, R. K. Assessment of survival of aging erythrocyte in circulation and attendant changes in size and CD147 expression by a novel two step biotinylation method. *Exp. gerontology* **41**, 855–861 (2006). DOI 10.1016/j.exger.2006.06.045.
70. Fernandez-Arias, C., Arias, C. F., & Rodriguez, A. Is malarial anaemia homologous to neocytolysis after altitude acclimatisation? *Int. J. Parasitol.*, **44**(1), 19-22. (2014). DOI 10.1016/j.ijpara.2013.06.011.

## Materials and methods

### Numerical simulations and statistics

The numerical simulations of Models 1 and 2 shown in Fig. 1 were performed using Julia software. The statistical analyses of the data (T-Tests and Mean difference confident intervals) were performed with Wolfram Mathematica.

## Mice and cells

Animal experiments were performed according to EU regulations and approved by the Órgão Responsável pelo Bem-Estar Animal (ORBEA) of Instituto de Medicina Molecular and by the Direção-Geral de Alimentação e Veterinária (Portugal). Female BALB/cByJ (age 5-8 weeks; weight  $\approx$ 20g per mouse) were acquired from Charles River® Laboratories (Barcelona, Spain) and housed in groups of five in ventilated cages (IVCs) in the Rodent Facility of the Instituto de Medicina Molecular João Lobo Antunes-Lisboa. Rat Kupffer cells (ThermoFisher, RTKCCS) were cultured according to the manufacturer. In brief, the Kupffer cells were thawed and cultured in RPMI medium supplemented with 10% FBS, 1% Penicillin-Streptomycin, and 1% L-glutamine for 24 hours in 96-wells plates pre-coated with collagen Type I (Sigma Aldrich).

## Double *in vivo* biotinylation staining of RBCs

We followed the biotin-staining protocol described in [69] modifying the timing of the injections according to the needs of our experiments. Mice were injected intravenously (i.v.) two consecutive days with 1 mg of biotin-X-NHS Ester (BXN) (Millipore, Merck) per mouse dissolved in 200  $\mu$ l of saline buffer. Seven days later, mice were injected i.v. with 0.6 mg of BXN per mouse dissolved in 200  $\mu$ l of saline buffer.

## EPO injections and staining of CD47

Balb/c mice were injected subcutaneously (s.c.) with 40IU of EPO (Recombinant HuEpo-alpha, Gibco) for four consecutive days. We analyzed the expression of CD47 (phycoerythrin-conjugated anti-mouse CD47 antibody, Biolegend) in reticulocytes (CD71+, APC conjugated anti-mouse CD71, Biolegend) after the last EPO injection by flow cytometer (BD LSRFortessa). All antibodies were used at 1  $\mu$ g/ $\mu$ l for 30 min. at 4°C unless specified otherwise. The FACS data were analyzed on FlowJo® software (TreeStar, v. 10.7.1). All experiments were performed at the Flow Cytometry Facility of the Instituto de Medicina Molecular João Lobo Antunes.

## Monitoring of RBC lifespan after hyperoxia

A hyperbaric chamber (ProOx 110 oxygen controller, BioSpherix, USA) was kindly provided by the laboratory of Dr. Claudio Franco at Instituto de Medicina Molecular (Lisboa). Mice were kept there for five days in a hyperoxic atmosphere (75% O<sub>2</sub>). After that period, mice returned to normoxia conditions. At this moment, two initial biotin injections (1mg/200  $\mu$ l) stained all the RBCs that were already in circulation before the hyperoxia condition (termed "biotin high RBCs" in the text). Seven days later, a third biotin injection (0.6 mg /200  $\mu$ l) labeled all the newborn RBCs formed during the hyperoxia treatment (referred to as "biotin intermediate RBCs" in the text). Both populations were monitored once a week for thirty-one days by flow cytometer (BD LSRFortessa). To that end, 1  $\mu$ l of blood was collected from the tail of each mouse by poking with a 25g needle, and stained with allophycocyanin (APC) conjugated streptavidin (Biolegend), which binds the biotin.

## Evaluation of SIRP- $\alpha$ expression in macrophages under hyperoxia

BALB/cByJ mice were put in the hyperbaric chamber for 1.5 hours in a hyperoxic atmosphere (75% O<sub>2</sub>). Mice were sacrificed immediately through CO<sub>2</sub> narcosis, followed by the rapid exposure of the abdominal cavity and cannulation of the hepatic portal vein using a 26-gauge needle. After that, the inferior vena cava was immediately incisioned to enable drainage. 10mL of PBS 1X per mouse were perfused in total. Then, the livers were collected in Petri dishes with PBS 1X at 3% of FBS. The livers were cut into small pieces with scissors and put in 1mL of collagenase solution (0,5 mg of collagenase type IV/1 ml of RPMI 1640 medium with Type IV DNase I; final concentration: 25units/ml, Sigma-Aldrich), and incubated for 10 minutes at 37°C. After stopping the reaction and passing the liver pieces through a strainer, the cells were washed and centrifuged at 50g or 200 rpm for 3 minutes to discard the hepatocytes. The supernatant was centrifuged and osmotic lysis buffer of RBCs (ammonium chloride/potassium hydrogen carbonate buffer) was added over the pellet. After washing, the cells were stained with F4/80 (using FITC-conjugated anti-mouse antibody, Biolegend) and SIRP- $\alpha$  (PE-conjugated anti-mouse antibody, Biolegend). Both antibodies were used at 2  $\mu$ g/ $\mu$ l.

### **Evaluation of anti-phosphatidylserine antibodies**

BALB/cByJ mice were kept in the hyperbaric chamber for a period of five days in a hyperoxic atmosphere (75% O<sub>2</sub>). After that, mice were returned to normoxic conditions for five more days. Then, the mice were sacrificed by CO<sub>2</sub> narcosis, and blood was collected by cardiac puncture. Blood was clotted at room temperature (RT) for 30 minutes, followed by centrifugation at 12.000 rpm for 10 minutes at 4°C. A commercial kit (Orgentec) was used to detect the presence of anti-PS antibodies in the serum of mice, following the instructions of the manufacturer. In brief, the samples were diluted 1/200 in the dilution buffer and 100 µl were added to each well and incubated for 1 hour at RT. The wells were then washed 5 times with 300 µl of washing buffer, and then the samples were incubated with 100ul of conjugate (goat anti-mouse HRP, Thermofisher) for 15 minutes at RT. Optical density was determined using a microplate reader (TECAN Infinite M200) at 450nm.

### **Kupffer cells staining**

Kupffer cells cultured in 96-well plates were supplemented with 30 µg EPO per well (recombinant rat EPO carrier-free, Biolegend). After 1,5 hours, they were collected after a three minutes incubation with trypsin and washed with cold PBS 1X. Then, they were stained with phycoerythrin-conjugated SIRP- $\alpha$  antibody (anti-rat, Biolegend) at 2 µg/µl. The Kupffer cells were kept on ice during the whole process.

### **Phagocytosis assay *in vitro***

Mouse splenocyte suspensions were obtained by mechanical disruption of the spleens through a cell strainer followed by osmotic lysis of RBCs with ammonium chloride/potassium hydrogen carbonate buffer. RBCs were labeled with 1 µg/µl DDAO (Invitrogen) for 1 h at 37°C. Splenocytes were incubated for 1 hour at 37°C in 96-well plates in RPMI 1640 medium (3 ml) (Sigma-Aldrich) with or without EPO (35U/well) (recombinant mouse EPO carrier-free, Biolegend). The ratio of splenocytes to RBCs was 1:1. This ratio ensures non-saturating conditions for phagocytosis by splenocytes, as can be monitored by the high fluorescence peaks. Cells were transferred to ice before staining for macrophage and FAC analysis. To analyze macrophages in the phagocytosis assay, splenocytes were labeled with FITC-anti-F4/80 at 2 µg/µl.
